# Supplementary material for: Incidence and Impact of Refeeding Syndrome in an Internal Medicine and Gastroenterology Ward of an Italian Tertiary Referral Center: A Prospective Cohort Study
Source: MDPI journal article supplement (doi:10.3390/nu14071343), 2022-03-23
Supplement: s1 [file s1]

## Supplementary files

**Table S1 .** Univariate analyses of risk factors associated with readmission n = 13)

|                                         | OR (95% CI)       | p-value |
|-----------------------------------------|-------------------|---------|
| Male                                    | 1.47 (0.47-4.54)  | 0.50    |
| Age                                     | 0.97 (0.94-1.02)  | 0.29    |
| ER admission                            | 5.24 (0.66-41.53) | 0.11    |
| CCI score                               | 1.11 (0.90-1.38)  | 0.31    |
| RS-related comorbidity                  | 1.21 (0.38-3.85)  | 0.74    |
| Weight                                  | 1.00 (0.97-1.04)  | 0.79    |
| Height                                  | 0.99 (0.93-1.07)  | 0.98    |
| Baseline BMI                            | 1.00 (0.89-1.12)  | 0.93    |
| Baseline NRS-2002 > 3                   | 0.55 (0.14-2.07)  | 0.37    |
| Baseline MUST                           | 0.75 (0.13-4.03)  | 0.74    |
| RS risk                                 | 1.78 (0.56-5.63)  | 0.32    |
| High RS Risk                            | 1.42 (0.32-6.32)  | 0.64    |
| RS                                      | 2.04 (0.59-7.01)  | 0.26    |
| Nutrition Team Support                  | 0.72 (0.14-3.63)  | 0.69    |
| Nutritional Supplementation Within 48 h | 1.15 (0.22-5.94)  | 0.86    |
| Oral Nutritional Supplementation        | 2.01 (0.64-6.21)  | 0.23    |
| Parenteral Nutrition                    | 1.23 (0.15-8.31)  | 0.85    |

Abbreviations: BMI, body mass index; CCI, charlson comorbidity index; CI, confidence interval; CONUT, controlling nutritional status; MUST, Malnutrition Universal Screening Tool; NRS, nutritional risk score; OR, odds ratio; RS, refeeding syndrome; SD, standard deviation. P-values in bold are statistically significant ( $p < 0.05$ ).
